# Supplementary material for: Functional and Structural Characterization of Pediococcus pentosaceus-Derived Biosurfactant and Its Biomedical Potential against Bacterial Adhesion, Quorum Sensing, and Biofilm Formation
Source: MDPI journal article supplement (doi:10.3390/antibiotics10111371), 2021-11-09
Supplement: s1 [file s1]

Article

# Functional and Structural Characterization of *Pediococcus pentosaceus*-Derived Biosurfactant and Its Biomedical Potential against Bacterial Adhesion, Quorum Sensing, and Biofilm Formation

Mohd Adnan <sup>1,\*</sup>, Arif Jamal Siddiqui <sup>1</sup>, Walid Sabri Hamadou <sup>1</sup>, Syed Amir Ashraf <sup>2</sup>, Md Imtaiyaz Hassan <sup>3</sup>, Mejd Snoussi <sup>1,4</sup>, Riadh Badraoui <sup>1,5</sup>, Arshad Jamal <sup>1</sup>, Fevzi Bardakci <sup>1</sup>, Amir Mahgoub Awadelkareem <sup>2</sup>, Manojkumar Sachidanandan <sup>6</sup> and Mitesh Patel <sup>7,\*</sup>

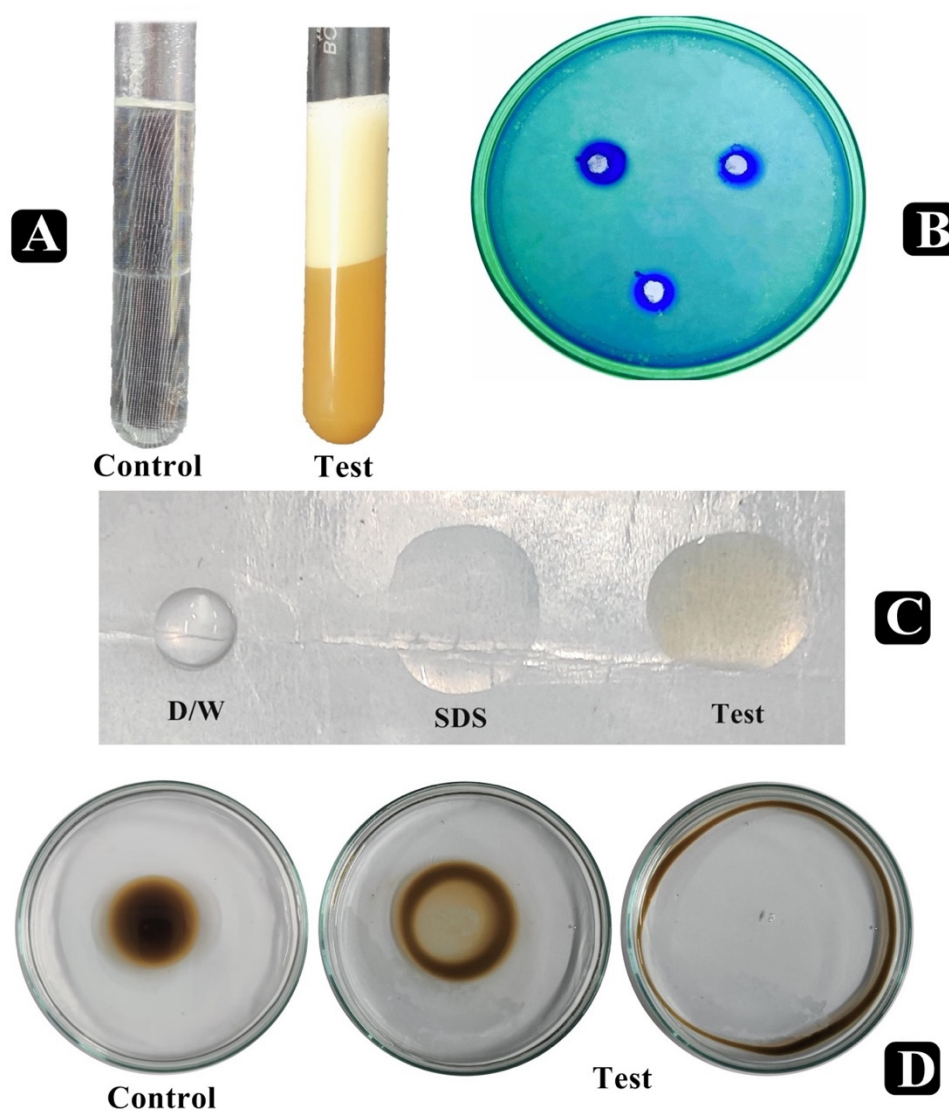

**Figure S1.** Screening of biosurfactant production A) Emulsification index test, B) Blue agar plate assay, C) Drop collapse assay, D) Oil spreading assay.
